# Correction: Lapatinib-Binding Protein Kinases in the African Trypanosome: Identification of Cellular Targets for Kinase-Directed Chemical Scaffolds

The *PLOS ONE* Staff

## Notice of Republication

This article was republished on February 21, 2014 to replace an incorrectly published version. Please download this article again to view the correct version. The originally published, uncorrected article and the republished, corrected article are provided here for reference.

## Supporting Information

File S1. Originally published, uncorrected article.  
(PDF)

File S2. Republished corrected article.  
(PDF)

## Reference

1. Katiyar S, Kufareva I, Behera R, Thomas SM, Ogata Y, et al. (2013) Lapatinib-Binding Protein Kinases in the African Trypanosome: Identification of Cellular Targets for Kinase-Directed Chemical Scaffolds. *PLoS ONE* 8(2): e56150. doi:10.1371/journal.pone.0056150

---

**Citation:** The *PLOS ONE* Staff (2014) Correction: Lapatinib-Binding Protein Kinases in the African Trypanosome: Identification of Cellular Targets for Kinase-Directed Chemical Scaffolds. *PLoS ONE* 9(3): e92488. doi:10.1371/journal.pone.0092488

**Published** March 26, 2014

**Copyright:** © 2014 The *PLOS ONE* Staff. This is an open-access article distributed under the terms of the Creative Commons Attribution License, which permits unrestricted use, distribution, and reproduction in any medium, provided the original author and source are credited.
